# Supplementary material
Source: PubMed Central journal article supplement (PMC8031468)
Supplement: NIHMS1645454-supplement-Supplementary_Info.pdf [file NIHMS1645454-supplement-Supplementary_Info.pdf]

## Supplemental Material

### Frailty Index

A deficit accumulation approach was used to calculate the frailty index in SPRINT.<sup>1,2</sup> To construct the frailty index in SPRINT, the 25-item frailty index from the African-American Health Study (AAH)<sup>3</sup> was modified based on 16 available items in SPRINT. An additional 20 items available in SPRINT and similar to the frailty index in Hypertension in the Very Elderly Trial (HYVET)<sup>4</sup> were also included. The 36-item list and scoring system is found in Supplemental Table 1 below. Gait speed assessed by the 4-meter walk test and was included in the SPRINT FI for the subset of participants  $\geq 75$  years, in whom it was measured.

Supplemental Table 1. Items and scoring system for the SPRINT frailty index<sup>1</sup>

| Item # | Source | Item                                                                                                                               | Response                  | Score | Notes |
|--------|--------|------------------------------------------------------------------------------------------------------------------------------------|---------------------------|-------|-------|
| 1      | AAH    | Self-rated general health                                                                                                          | Excellent                 | 0     |       |
|        |        |                                                                                                                                    | Very Good                 | 0.25  |       |
|        |        |                                                                                                                                    | Good                      | 0.5   |       |
|        |        |                                                                                                                                    | Fair                      | 0.75  |       |
|        |        |                                                                                                                                    | Poor                      | 1     |       |
| 2      | AAH    | Does your health limit you now in moderate activities, such as moving a table, pushing a vacuum cleaner, bowling, or playing golf? | No, not limited at all    | 0     |       |
|        |        |                                                                                                                                    | Yes, limited a little     | 0.5   |       |
|        |        |                                                                                                                                    | Yes, limited a lot        | 1     |       |
| 3      | AAH    | Does your health limit you now in climbing several flights of stairs?                                                              | No, not limited at all    | 0     |       |
|        |        |                                                                                                                                    | Yes, limited a little     | 0.5   |       |
|        |        |                                                                                                                                    | Yes, limited a lot        | 1     |       |
| 4      | AAH    | During the past 4 weeks, have you accomplished less than you would like as a result of your physical health?                       | No, none of the time      | 0     |       |
|        |        |                                                                                                                                    | Yes, a little of the time | 0.25  |       |
|        |        |                                                                                                                                    | Yes, some of the time     | 0.5   |       |
|        |        |                                                                                                                                    | Yes, most of the time     | 0.75  |       |
|        |        |                                                                                                                                    | Yes, all of the time      | 1     |       |
| 5      | AAH    | During the past 4 weeks, did you not do work or other activities as carefully as usual due to emotional problems?                  | No, none of the time      | 0     |       |
|        |        |                                                                                                                                    | Yes, a little of the time | 0.25  |       |
|        |        |                                                                                                                                    | Yes, some of the time     | 0.5   |       |
|        |        |                                                                                                                                    | Yes, most of the time     | 0.75  |       |
|        |        |                                                                                                                                    | Yes, all of the time      | 1     |       |
| 6      | HYVET  | During the past 4 weeks, how much did pain interfere with your normal work?                                                        | Not at all                | 0     |       |
|        |        |                                                                                                                                    | A little bit              | 0.25  |       |
|        |        |                                                                                                                                    | Moderately                | 0.5   |       |
|        |        |                                                                                                                                    | Quite a bit               | 0.75  |       |
|        |        |                                                                                                                                    | Extremely                 | 1     |       |

|   |     |                                                                            |                        |     |
|---|-----|----------------------------------------------------------------------------|------------------------|-----|
| 7 | AAH | How much of the time during the past 4 weeks did you have a lot of energy? | All of the time        | 0   |
|   |     |                                                                            | Most of the time       | 0.2 |
|   |     |                                                                            | A good bit of the time | 0.4 |
|   |     |                                                                            | Some of the time       | 0.6 |
|   |     |                                                                            | A little of the time   | 0.8 |
|   |     |                                                                            | None of the time       | 1   |

| Item # | Source | Item                                                                                                                                 | Response                                        | Score | Notes |
|--------|--------|--------------------------------------------------------------------------------------------------------------------------------------|-------------------------------------------------|-------|-------|
| 8      | AAH    | How much of the time during the past 4 weeks have you felt downhearted and blue?                                                     | None of the time                                | 0     |       |
|        |        |                                                                                                                                      | A little of the time                            | 0.2   |       |
|        |        |                                                                                                                                      | Some of the time                                | 0.4   |       |
|        |        |                                                                                                                                      | A good bit of the time                          | 0.6   |       |
|        |        |                                                                                                                                      | Most of the time                                | 0.8   |       |
|        |        |                                                                                                                                      | All of the time                                 | 1     |       |
| 9      | HYVET  | During the past 4 weeks, how much of the time has your physical health or emotional problems interfered with your social activities? | None of the time                                | 0     |       |
|        |        |                                                                                                                                      | A little of the time                            | 0.25  |       |
|        |        |                                                                                                                                      | Some of the time                                | 0.5   |       |
|        |        |                                                                                                                                      | Most of the time                                | 0.75  |       |
| 10     | HYVET  | Self-care                                                                                                                            | I have no problems with self-care               | 0     |       |
|        |        |                                                                                                                                      | I have some problems washing or dressing myself | 0.5   |       |
|        |        |                                                                                                                                      | I am unable to wash or dress myself             | 1     |       |
| 11     | AAH    | Over the last two weeks, have you had trouble falling or staying asleep, or sleeping too much?                                       | Not at all                                      | 0     |       |
|        |        |                                                                                                                                      | Several days                                    | 0.33  |       |
|        |        |                                                                                                                                      | More than half the days                         | 0.67  |       |
|        |        |                                                                                                                                      | Nearly every day                                | 1     |       |
| 12     | HYVET  | Smoking status                                                                                                                       | Never smoker                                    | 0     |       |
|        |        |                                                                                                                                      | Former smoker                                   | 0.5   |       |
|        |        |                                                                                                                                      | Current smoker                                  | 1     |       |
| 13     | AAH    | Self-reported history of stroke                                                                                                      |                                                 | 1     |       |
| 14     | AAH    | Self-reported history of diabetes                                                                                                    |                                                 | 1     |       |
| 15     | AAH    | Self-reported history of heart attack                                                                                                |                                                 | 1     |       |

|               |             |                                                                                             |                                                                                  |              |                                                                                                                                                                                |
|---------------|-------------|---------------------------------------------------------------------------------------------|----------------------------------------------------------------------------------|--------------|--------------------------------------------------------------------------------------------------------------------------------------------------------------------------------|
| 16            | AAH         | Self-reported history of cancer                                                             |                                                                                  | 1            |                                                                                                                                                                                |
| 17            | AAH         | Self-reported history of heart failure                                                      |                                                                                  | 1            |                                                                                                                                                                                |
| 18            | AAH         | Self-reported history of angina                                                             |                                                                                  | 1            |                                                                                                                                                                                |
| 19            | HYVET       | Self-reported history of atrial fibrillation or atrial fibrillation detected on ECG reading |                                                                                  | 1            |                                                                                                                                                                                |
| <b>Item #</b> | <b>Item</b> | <b>Response</b>                                                                             | <b>Score</b>                                                                     | <b>Notes</b> |                                                                                                                                                                                |
| 20            | AAH         | Chronic Kidney Disease                                                                      | eGFR <60 ml/min/1.73m <sup>2</sup>                                               | 1            | Based on CKD-EPI equation <sup>9</sup>                                                                                                                                         |
| 21            | SPRINT      | Albuminuria                                                                                 | ≥30 but less <300 mg/g Cr                                                        | 0.5          |                                                                                                                                                                                |
|               |             |                                                                                             | ≥300 mg/g Cr                                                                     | 1            |                                                                                                                                                                                |
| 22            | HYVET       | HDL Cholesterol                                                                             | <0.4 or >1.5 mmol/l                                                              | 1            |                                                                                                                                                                                |
| 23            | HYVET       | Total Cholesterol                                                                           | <3.5 or >7 mmol/l                                                                | 1            |                                                                                                                                                                                |
| 24            | HYVET       | Potassium                                                                                   | <3.5 or >6 mmol/l                                                                | 1            |                                                                                                                                                                                |
| 25            | HYVET       | Sodium                                                                                      | <135 or >150 mmol/l                                                              | 1            |                                                                                                                                                                                |
| 26            | HYVET       | Glucose                                                                                     | <2.8 or >11 mmol/l                                                               | 1            |                                                                                                                                                                                |
| 27            | HYVET       | Blood Urea Nitrogen                                                                         | <3 or >7.5 mmol/l                                                                | 1            |                                                                                                                                                                                |
| 28            | HYVET       | Overweight / Obesity                                                                        | BMI ≥ 25 but <30 kg/m <sup>2</sup>                                               | 0.5          |                                                                                                                                                                                |
|               |             |                                                                                             | BMI ≥ 30 kg/m <sup>2</sup>                                                       | 1            |                                                                                                                                                                                |
| 29            | HYVET       | Underweight                                                                                 | BMI < 18.5 kg/m <sup>2</sup>                                                     | 1            |                                                                                                                                                                                |
| 30            | HYVET       | Systolic Blood Pressure                                                                     | ≥ 180 mmHg                                                                       | 1            |                                                                                                                                                                                |
| 31            | HYVET       | Diastolic Blood Pressure                                                                    | ≥ 90 mmHg                                                                        | 1            |                                                                                                                                                                                |
| 32            | HYVET       | Orthostatic hypotension                                                                     | Difference in seated - standing SBP ≥ 20 mmHg or seated - standing DBP ≥ 10 mmHg | 1            |                                                                                                                                                                                |
| 33            | AAHS        | Global Cognitive Status (MoCA)                                                              | < age and education specific 25th percentile                                     | 1            | Estimated percentiles from Kenny et al. <sup>2</sup> To correct for racial/ethnic differences, 2 points were added to the scores of African-American and Hispanic participants |

|    |        |                               |                                                          |   |
|----|--------|-------------------------------|----------------------------------------------------------|---|
| 34 | HYVET  | MoCA Orientation Score        | ≤ 4 out of 6                                             | 1 |
| 35 | SPRINT | Logical Memory Delayed Recall | 1.5 SD or more below normative mean for age <sup>a</sup> | 1 |
| 36 | SPRINT | Digit Symbol - Copy           | 1.5 SD or more below normative mean for age <sup>b</sup> | 1 |

| Item # | Item   | Response   | Score               | Notes |                                                                           |
|--------|--------|------------|---------------------|-------|---------------------------------------------------------------------------|
| 37     | SPRINT | Gait Speed | ≥ 1.0 m/s           | 0     | Only measured in participants 75 years and older at time of randomization |
|        |        |            | ≥ 0.8 but < 1.0 m/s | 0.33  |                                                                           |
|        |        |            | ≥ 0.6 but < 0.8 m/s | 0.67  |                                                                           |
|        |        |            | < 0.6 m/s           | 1     |                                                                           |

#### References

1. Pajewski NM, Williamson JD, Applegate WB, et al. Characterizing frailty status in the systolic blood pressure intervention trial. *J Gerontol A Biol Sci Med Sci.* 2016;71(5):649-655.
2. Rockwood K, Mitnitski A. Frailty in relation to the accumulation of deficits. *J Gerontol A Biol Sci Med Sci.* 2007;62(7):722-727.
3. Malmstrom TK, Miller DK, Morley JE. A comparison of four frailty models. *J Am Geriatr Soc.* 2014;62(4):721-726.
4. Warwick J, Falaschetti E, Rockwood, K, et al. No evidence that frailty modifies the positive impact of antihypertensive treatment in very elderly people: an investigation of the impact of frailty upon treatment effect in the in the Hypertension in the Very Elderly Trial (HIVET) study, a double-blind, placebo-controlled study of antihypertensives in people with hypertension aged 80 or over. *BMC medicine.* 2015;13(78):1-8.

Supplemental Table 2. Baseline characteristics among SPRINT participants with CKD by fall

|                                             | <b>No Falls<br/>N = 2274</b> | <b>Falls<br/>N = 102</b> |
|---------------------------------------------|------------------------------|--------------------------|
| <b>Age, years</b>                           | 73 ± 9                       | 80 ± 9                   |
| <b>Female</b>                               | 900 (40)                     | 48 (47)                  |
| <b>Race, White</b>                          | 1482 (65)                    | 77 (76)                  |
| <b>Treatment randomization</b>              |                              |                          |
| <b>Standard</b>                             | 1113 (49)                    | 55 (54)                  |
| <b>Intensive</b>                            | 1161 (51)                    | 47 (46)                  |
| <b>Prevalent CVD</b>                        | 567 (25)                     | 38 (37)                  |
| <b>Prevalent heart failure</b>              | 139 (6)                      | 14 (14)                  |
| <b>eGFR-CrCys, mL/min/1.73m<sup>2</sup></b> | 49 ± 11                      | 48 ± 12                  |
| <b>UACR, mg/g</b>                           | 87 ± 253                     | 93 ± 243                 |
| <b>SBP, mmHg</b>                            | 140 ± 16                     | 143 ± 18                 |
| <b>DBP, mmHg</b>                            | 75 ± 12                      | 72 ± 12                  |
| <b>Antihypertensive medication, number</b>  | 2.1 ± 1.0                    | 2.2 ± 1.0                |
| <b>Smoking</b>                              |                              |                          |
| <b>Never</b>                                | 1037 (46)                    | 38 (37)                  |
| <b>Former</b>                               | 1031 (45)                    | 56 (55)                  |
| <b>Current</b>                              | 206 (9)                      | 8 (8)                    |
| <b>Body mass index, m/kg<sup>2</sup></b>    | 30 ± 6                       | 27 ± 5                   |
| <b>Serum Calcium, mg/mL</b>                 | 9.6 ± 0.5                    | 9.6 ± 0.5                |
| <b>Serum Phosphate, mg/mL</b>               | 3.5 ± 0.6                    | 3.6 ± 0.5                |
| <b>Serum PTH, pg/mL</b>                     | 56 ± 33                      | 56 ± 36                  |
| <b>Serum FGF23, pg/mL</b>                   | 66 [52 – 87]                 | 80 [59 – 102]            |
| <b>Frailty</b>                              |                              |                          |

|                  |           |         |
|------------------|-----------|---------|
| <b>Non-frail</b> | 254 (11)  | 11 (11) |
| <b>Pre-frail</b> | 1209 (53) | 38 (37) |
| <b>Frail</b>     | 811 (36)  | 53 (52) |

Data presented as N (%), mean  $\pm$  SD, or median [IQR]

Abbreviations: FGF23, fibroblast growth factor 23; eGFR-CrCys, estimated glomerular filtration rate; UACR, urine albumin-creatinine-ratio; SBP, systolic blood pressure; DBP, diastolic blood pressure; PTH, parathyroid hormone

Supplemental Table 3. Baseline characteristics among SPRINT participants  $\geq 75$  years with CKD

|                                             | <b>Total Cohort<br/>N = 1192</b> | <b>FGF23 Q1<br/>N = 298</b> | <b>FGF23 Q2<br/>N = 298</b> | <b>FGF23 Q3<br/>N = 297</b> | <b>FGF23 Q4<br/>N = 299</b>   |
|---------------------------------------------|----------------------------------|-----------------------------|-----------------------------|-----------------------------|-------------------------------|
| <b>FGF23, pg/mL</b>                         | <b>66.3 [52.7-88.6]</b>          | <b>&lt;52.8</b>             | <b>52.8-67.2</b>            | <b>67.3-89.0</b>            | <b><math>\geq 89.1</math></b> |
| <b>Age, years</b>                           | 81 $\pm$ 4                       | 81 $\pm$ 4                  | 80 $\pm$ 4                  | 81 $\pm$ 5                  | 81 $\pm$ 4                    |
| <b>Female</b>                               | 446 (37)                         | 104 (35)                    | 104 (35)                    | 116 (39)                    | 122 (41)                      |
| <b>Race, White</b>                          | 894 (75)                         | 208 (70)                    | 233 (78)                    | 229 (77)                    | 224 (75)                      |
| <b>Treatment randomization</b>              |                                  |                             |                             |                             |                               |
| <b>Standard</b>                             | 593 (50)                         | 140 (47)                    | 149 (50)                    | 157 (53)                    | 153 (51)                      |
| <b>Intensive</b>                            | 599 (50)                         | 158 (53)                    | 149 (50)                    | 140 (47)                    | 146 (49)                      |
| <b>Prevalent CVD</b>                        | 344 (29)                         | 73 (25)                     | 88 (29)                     | 98 (33)                     | 85 (28)                       |
| <b>Prevalent heart failure</b>              | 77 (7)                           | 14 (15)                     | 18 (6)                      | 20 (7)                      | 25 (8)                        |
| <b>eGFR-CrCys, mL/min/1.73m<sup>2</sup></b> | 50 $\pm$ 11                      | 54 $\pm$ 10                 | 52 $\pm$ 9                  | 50 $\pm$ 11                 | 43 $\pm$ 12                   |
| <b>UACR, mg/g</b>                           | 75 $\pm$ 213                     | 45 $\pm$ 113                | 53 $\pm$ 150                | 73 $\pm$ 189                | 127 $\pm$ 326                 |
| <b>SBP, mmHg</b>                            | 142 $\pm$ 17                     | 142 $\pm$ 16                | 142 $\pm$ 15                | 141 $\pm$ 18                | 141 $\pm$ 18                  |
| <b>DBP, mmHg</b>                            | 70 $\pm$ 12                      | 72 $\pm$ 12                 | 71 $\pm$ 11                 | 70 $\pm$ 12                 | 69 $\pm$ 11                   |
| <b>Antihypertensive medication, number</b>  | 2.2 $\pm$ 1.0                    | 2.0 $\pm$ 1.0               | 2.1 $\pm$ 1.0               | 2.2 $\pm$ 1.0               | 2.3 $\pm$ 1.0                 |
| <b>Smoking</b>                              |                                  |                             |                             |                             |                               |
| <b>Never</b>                                | 556 (47)                         | 135 (45)                    | 138 (46)                    | 139 (47)                    | 144 (48)                      |
| <b>Former</b>                               | 591 (50)                         | 147 (49)                    | 152 (51)                    | 148 (50)                    | 144 (48)                      |
| <b>Current</b>                              | 45 (4)                           | 16 (5)                      | 8 (3)                       | 10 (3)                      | 11 (4)                        |
| <b>Body mass index, kg/m<sup>2</sup></b>    | 30 $\pm$ 6                       | 28 $\pm$ 5                  | 28 $\pm$ 5                  | 28 $\pm$ 5                  | 28 $\pm$ 6                    |
| <b>Serum Calcium, mg/mL</b>                 | 9.6 $\pm$ 0.5                    | 9.5 $\pm$ 0.4               | 9.5 $\pm$ 0.4               | 9.6 $\pm$ 0.5               | 9.6 $\pm$ 0.5                 |
| <b>Serum Phosphate, mg/mL</b>               | 3.5 $\pm$ 0.5                    | 3.4 $\pm$ 0.5               | 3.5 $\pm$ 0.5               | 3.6 $\pm$ 0.5               | 3.6 $\pm$ 0.5                 |

|                            |           |           |           |            |          |
|----------------------------|-----------|-----------|-----------|------------|----------|
| <b>Serum PTH, pg/mL</b>    | 55 ± 31   | 48 ± 19   | 50 ± 23   | 55 ± 31    | 66 ± 43  |
| <b>Gait speed, seconds</b> | 5.9 ± 213 | 5.8 ± 6.6 | 6.2 ± 9.5 | 6.4 ± 12.4 | 5.3 ± 2  |
| <b>Frailty</b>             |           |           |           |            |          |
| <b>Non-frail</b>           | 143 (12)  | 39 (13)   | 47 (16)   | 27 (9)     | 30 (10)  |
| <b>Pre-frail</b>           | 625 (52)  | 167 (56)  | 157 (53)  | 159 (54)   | 142 (48) |
| <b>Frail</b>               | 424 (36)  | 92 (31)   | 94 (32)   | 11 (37)    | 127 (43) |



Supplemental Table 4. Baseline characteristics of SPRINT participants  $\geq 75$  years with CKD by fall

|                                             | <b>No Falls<br/>N = 1111</b> | <b>Falls<br/>N = 81</b> |
|---------------------------------------------|------------------------------|-------------------------|
| <b>Age, years</b>                           | 80 $\pm$ 4                   | 83 $\pm$ 5              |
| <b>Female</b>                               | 411 (37)                     | 35 (43)                 |
| <b>Race, White</b>                          | 831 (75)                     | 63 (78)                 |
| <b>Treatment randomization</b>              |                              |                         |
| <b>Standard</b>                             | 552 (50)                     | 47 (58)                 |
| <b>Intensive</b>                            | 559 (50)                     | 34 (42)                 |
| <b>Prevalent CVD</b>                        | 311 (28)                     | 33 (40)                 |
| <b>Prevalent heart failure</b>              | 66 (6)                       | 11 (14)                 |
| <b>eGFR-CrCys, mL/min/1.73m<sup>2</sup></b> | 50 $\pm$ 11                  | 49 $\pm$ 11             |
| <b>UACR, mg/g</b>                           | 76 $\pm$ 219                 | 58 $\pm$ 109            |
| <b>SBP, mmHg</b>                            | 141 $\pm$ 17                 | 144 $\pm$ 17            |
| <b>DBP, mmHg</b>                            | 70 $\pm$ 12                  | 69 $\pm$ 11             |
| <b>Antihypertensive medication, number</b>  | 2.1 $\pm$ 1.0                | 2.2 $\pm$ 1.0           |
| <b>Smoking</b>                              |                              |                         |
| <b>Never</b>                                | 526 (47)                     | 30 (37)                 |
| <b>Former</b>                               | 544 (49)                     | 47 (58)                 |
| <b>Current</b>                              | 41 (4)                       | 4 (5)                   |
| <b>Body mass index, m/kg<sup>2</sup></b>    | 28 $\pm$ 5                   | 27 $\pm$ 5              |
| <b>Serum Calcium, mg/mL</b>                 | 9.6 $\pm$ 0.5                | 9.6 $\pm$ 0.5           |
| <b>Serum Phosphate, mg/mL</b>               | 3.6 $\pm$ 0.6                | 3.5 $\pm$ 0.5           |
| <b>Serum PTH, pg/mL</b>                     | 55 $\pm$ 31                  | 53 $\pm$ 35             |
| <b>Serum FGF23, pg/mL</b>                   | 66 [53 – 88]                 | 71 [57 – 98]            |
| <b>Gait speed, seconds</b>                  | 5.8 $\pm$ 8.2                | 7.7 $\pm$ 12            |

**Frailty**

|                  |          |         |
|------------------|----------|---------|
| <b>Non-frail</b> | 133 (12) | 10 (12) |
| <b>Pre-frail</b> | 596 (54) | 29 (36) |
| <b>Frail</b>     | 382 (34) | 42 (52) |

Supplemental Table 5. Association of FGF23 concentrations and risk of falls among SPRINT participants <75 years with CKD (N = 1184)

|                        | <b><u>Unadjusted</u></b> | <b><u>Model 1</u></b>  | <b><u>Model 2</u></b>  |
|------------------------|--------------------------|------------------------|------------------------|
| Log <sub>2</sub> FGF23 | 2.78<br>(1.67 – 4.64)    | 4.37<br>(2.02 – 9.47)  | 4.38<br>(2.02 – 9.48)  |
| Quartile 1             | REFERENCE                | REFERENCE              | REFERENCE              |
| Quartile 2             | 1.60<br>(0.27 – 9.59)    | 1.78<br>(0.29 – 10.94) | 1.79<br>(0.29 – 10.98) |
| Quartile 3             | 1.99<br>(0.0.37 – 10.88) | 2.20<br>(0.39 – 12.52) | 2.20<br>(0.39 – 12.47) |
| Quartile 4             | 5.91<br>(1.31 – 26.66)   | 7.08<br>(1.41 – 35.58) | 7.02<br>(1.40 – 35.16) |

Model 1: adjusted for age, gender, race, randomized treatment arm, smoking, CVD, CHF, body mass index, systolic and diastolic blood pressures, eGFR, UACR, # antihypertensive medications at baseline, and serum calcium, phosphorus, and PTH concentrations. Model 2: adjusted for covariables in model 1 plus frailty index
